# Supplementary material for: Polyvinyl Alcohol–Citric Acid: A New Material for Green and Efficient Removal of Cationic Dye Wastewater
Source: MDPI journal article supplement (doi:10.3390/polym15224341), 2023-11-07
Supplement: s1 [file s1]

## Supporting Information

# Polyvinyl Alcohol–Citric Acid: A New Material for Green and Efficient Removal of Cationic Dye Wastewater

Ye He <sup>1,†</sup>, Yangyang Zheng <sup>1,†</sup>, Xia Liu <sup>2,†</sup>, Chang Liu <sup>1</sup>, Huacheng Zhang <sup>1,\*</sup> and Jie Han <sup>3,\*</sup>

<sup>1</sup> School of Chemical Engineering and Technology, Xi'an Jiaotong University, Xi'an 710049, China

<sup>2</sup> Shandong Nonmetallic Materials Institute, Jinan 250031, China

<sup>3</sup> Key Laboratory of Advanced Energy Materials Chemistry (Ministry of Education), College of Chemistry, Nankai University, Tianjin 300071, China

\* Correspondence: zhanghuacheng@xjtu.edu.cn (H.Z.);  
hanjie@nankai.edu.cn (J.H.)

<sup>†</sup> These authors contributed equally to this work.

## 1. Figures

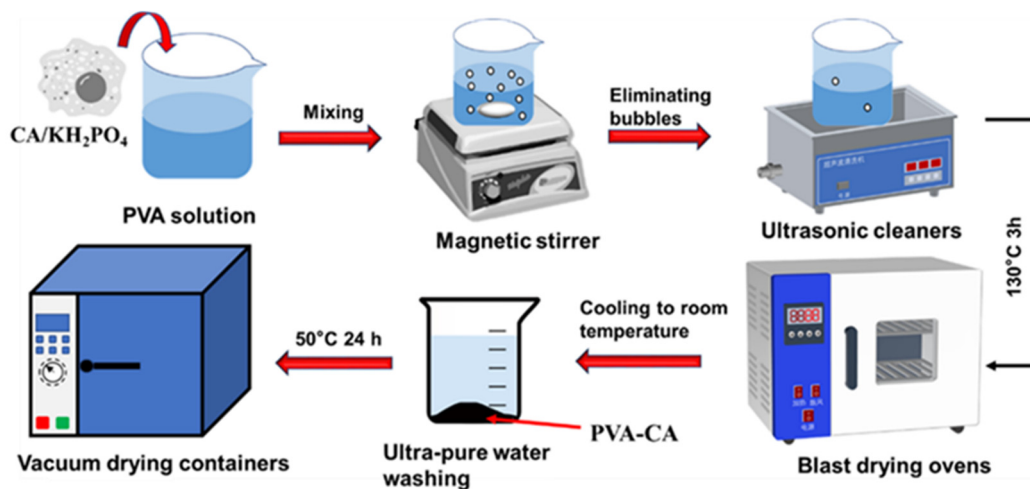

**Figure S1** Procedure diagram for the preparation of PVA-CA.

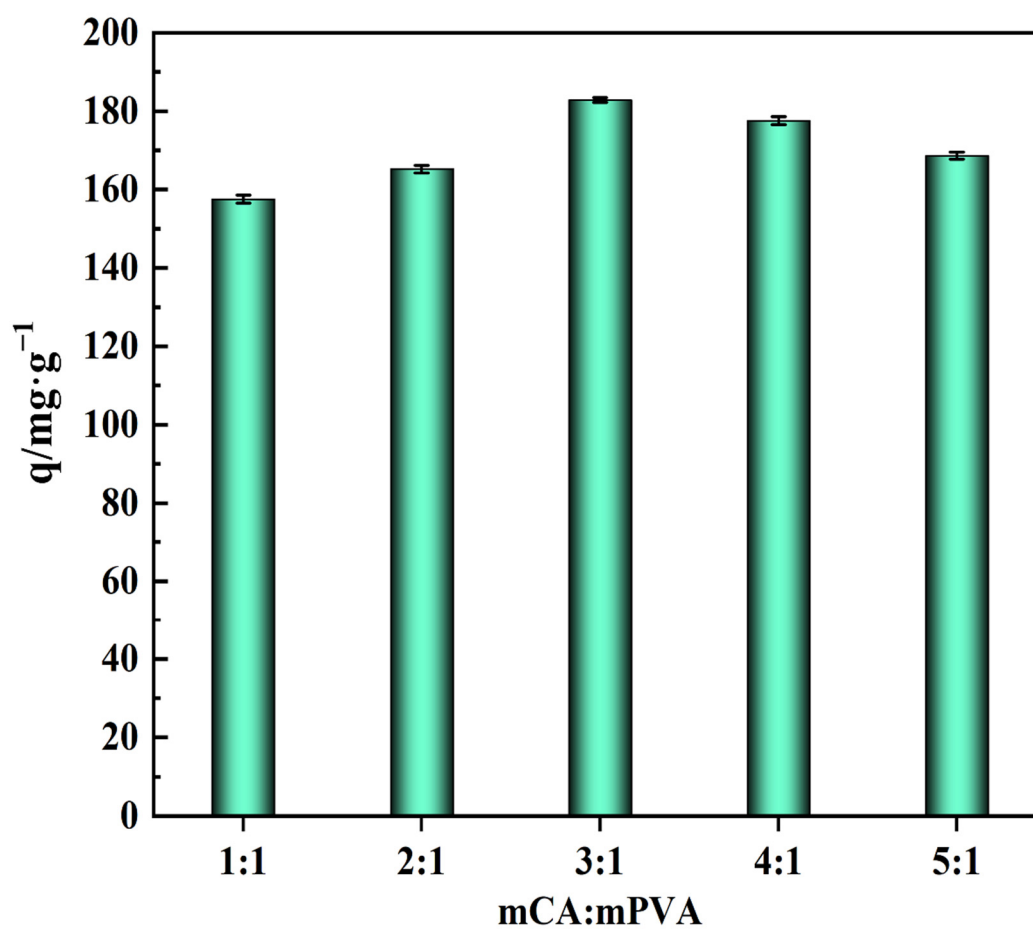

**Figure S2** The effect of mass ratio of CA to PVA on the adsorption performance of

PVA-CA, the adsorption capacity of PVA-CA on MB increased with the increase of the mass ratio of CA to PVA, reaching a maximum value of  $182.8 \text{ mg g}^{-1}$  at a mass ratio of 3/1.

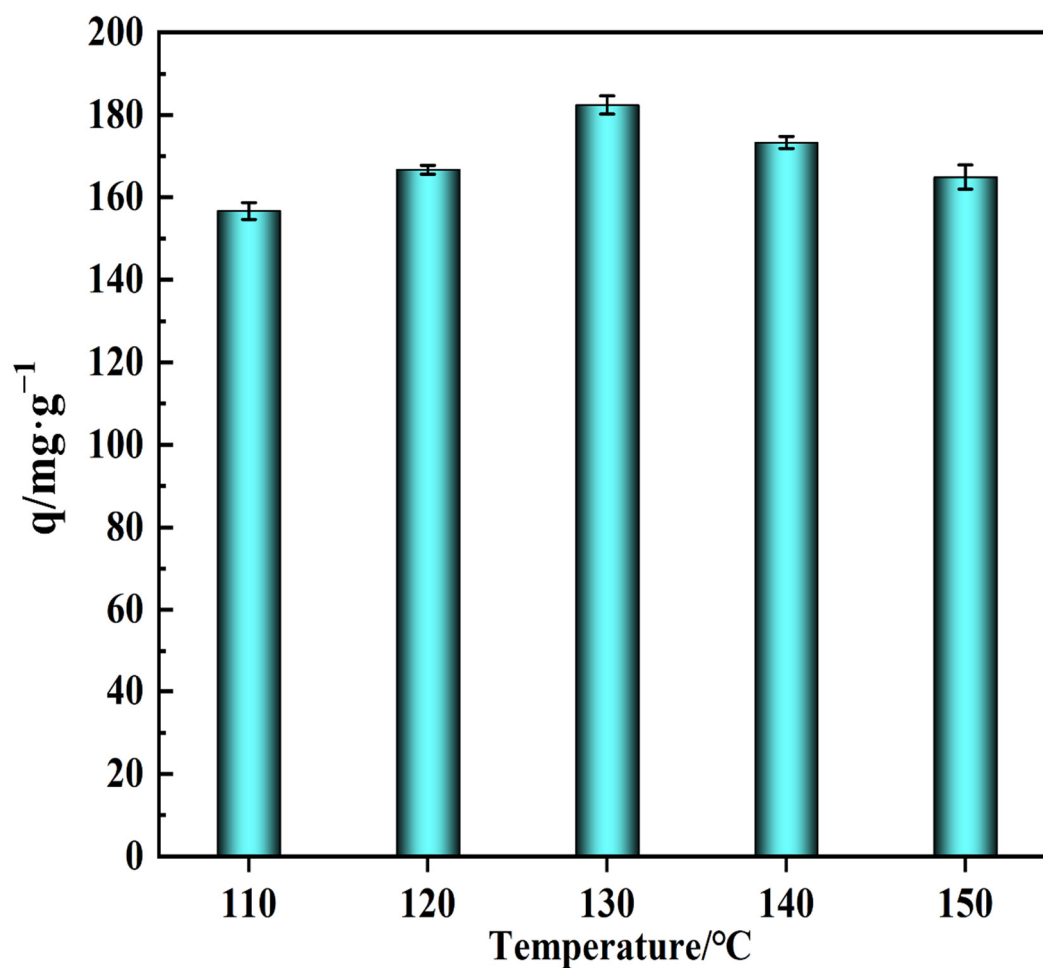

**Figure S3** The effect of reaction temperature on the adsorption performance of PVA-CA showed the maximum adsorption capacity of  $182.37 \text{ mg g}^{-1}$  when the temperature reached  $130^{\circ}\text{C}$ .

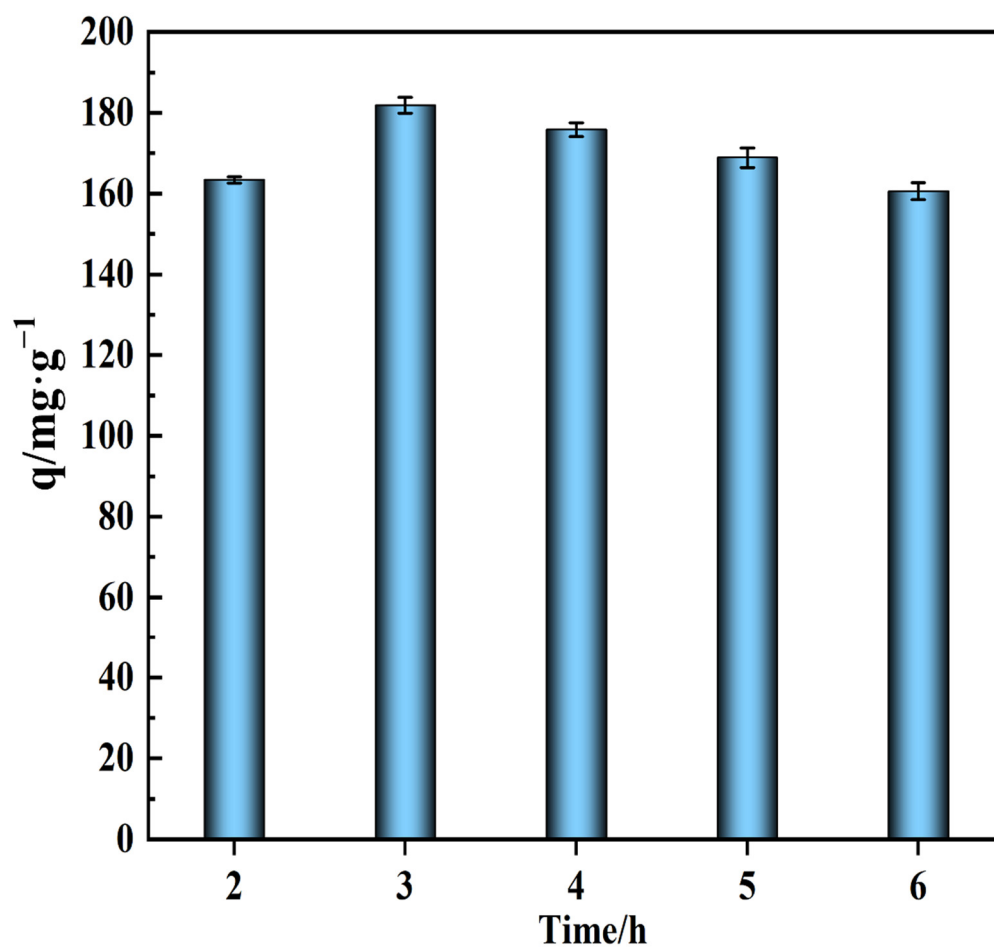

**Figure S4** The effect of reaction time on the adsorption performance of PVA-CA, the adsorption capacity of PVA-CA on MB showed a trend of increasing and then decreasing with the increase of reaction time, and had the highest adsorption capacity of  $181.87 \text{ mg g}^{-1}$  at the reaction time of 3 h.

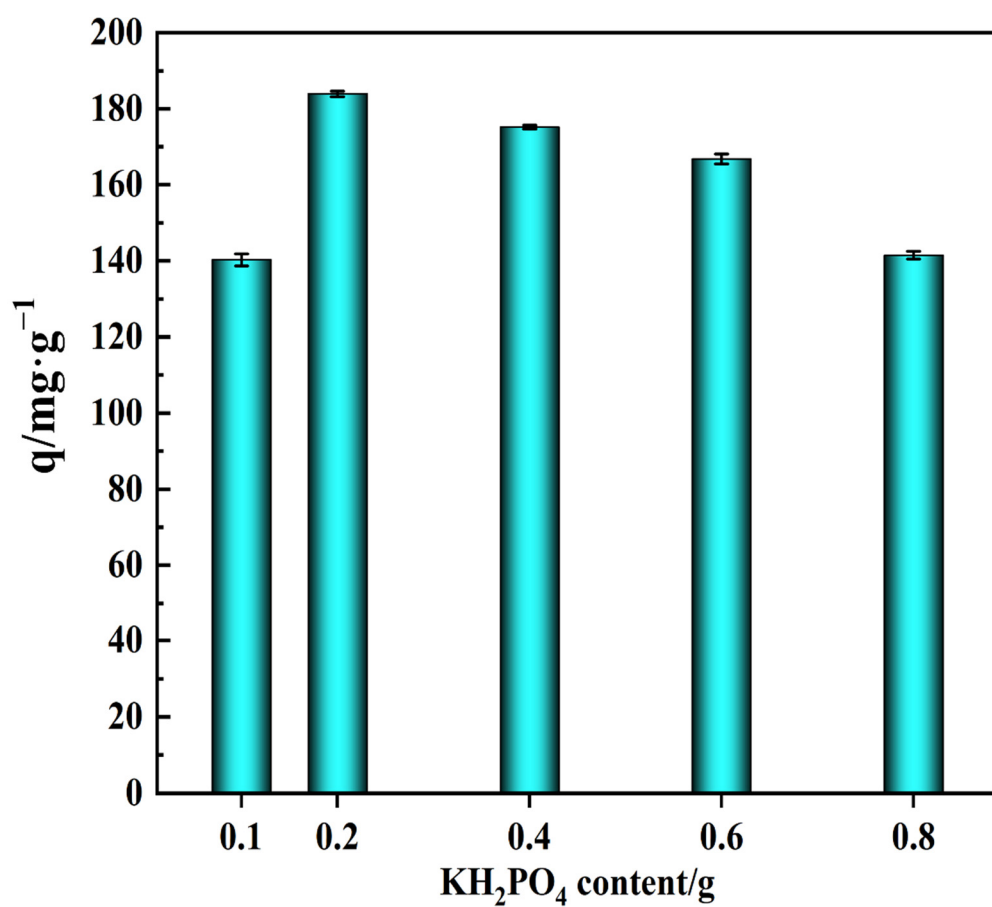

**Figure S5** The influence of the amount of  $\text{KH}_2\text{PO}_4$  on the adsorption performance of PVA-CA, the adsorption capacity of PVA-CA on MB showed a trend of increasing and then decreasing with the increase of the amount of  $\text{KH}_2\text{PO}_4$ . And had the highest adsorption capacity of  $183.87 \text{ mg g}^{-1}$  at the addition of 0.2 g of  $\text{KH}_2\text{PO}_4$ .

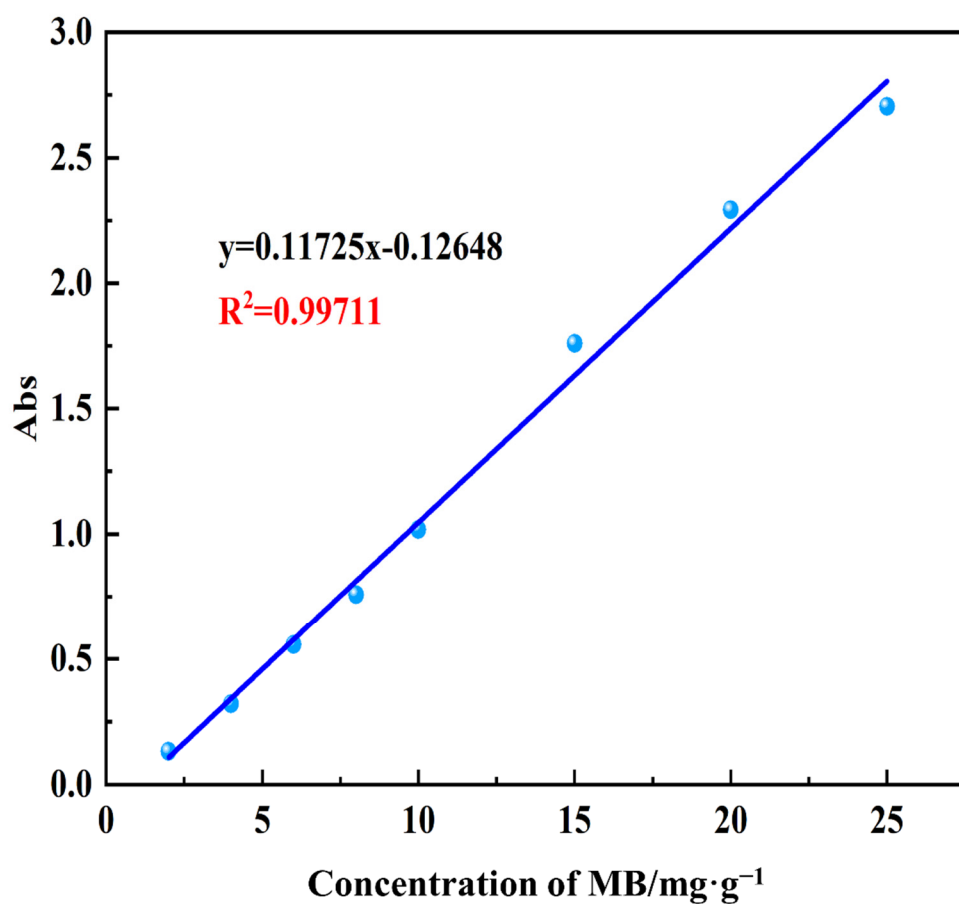

Figure S6 The standard curve of MB solution.

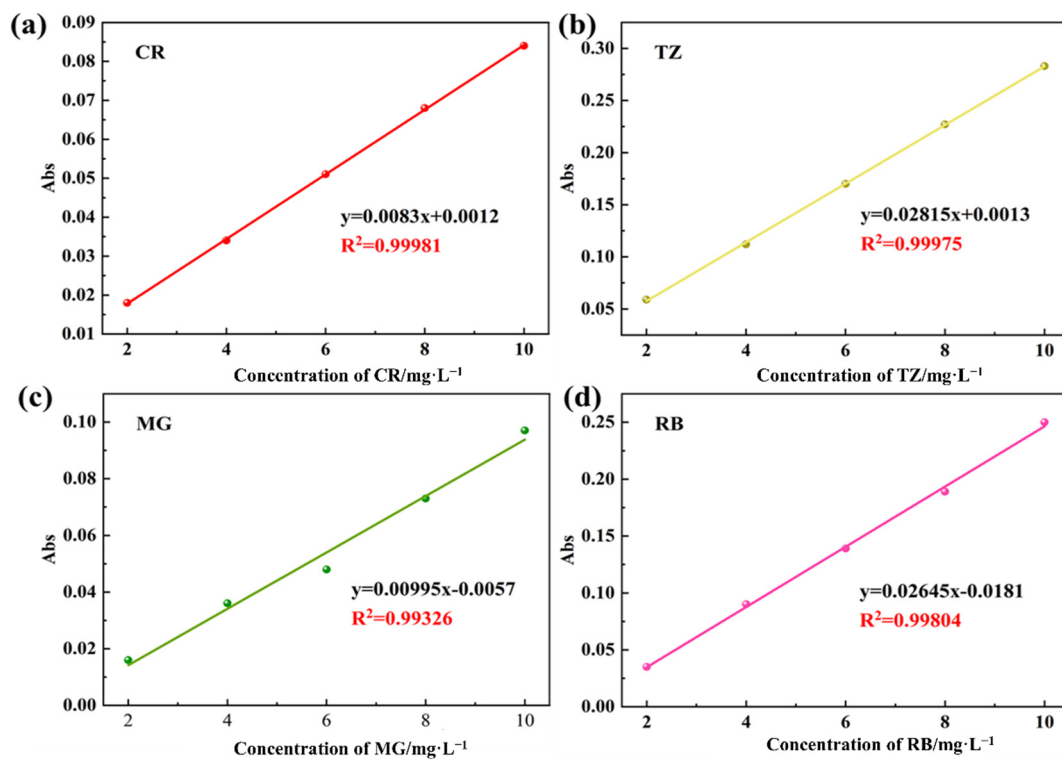

**Figure S7** Standard curve of each dye solution. A series of MB solutions were prepared with a concentration range of 0 to 25.0 mg L<sup>-1</sup> (0, 2.0, 4.0, 6.0, 8.0, 10.0, 15, 20, 25 mg L<sup>-1</sup>). The absorbance at the maximum absorption wavelength (664 nm) was measured, and the standard curve for the MB was obtained using the MB concentration (C, mg L<sup>-1</sup>) as the x-coordinate and the absorbance (A) as the y-coordinate (Fig. S6). The experimental results showed a good linear relationship between absorbance and MB concentration with a linear equation of  $A = -0.12648 + 0.11725 C$  ( $R^2 = 0.99711$ ).

## 2. Tables

### 1) Orthogonal experimental design

A three-factor, three-level orthogonal experiment was conducted to explore the best preparation scheme based on a single-factor experiment with the levels and factors shown in Table. S1.

**Table. S1** Orthogonal experiment level and factor table.

| level | Factors  |                |        |
|-------|----------|----------------|--------|
|       | mCA:mPVA | Temperature/°C | Time/h |
|       | A        | B              | C      |
| 1     | 2:1      | 130            | 3      |
| 2     | 3:1      | 140            | 4      |
| 3     | 4:1      | 150            | 5      |

### 2) Analysis of orthogonal experimental results

**Table. S2** The results of the orthogonal experiments.  $K_1$  denotes the index examined in the experiment where the first level of factors A, B, and C, *i.e.*, mCA:mPVA.  $K_2$  denotes the index examined in the experiment where the second level of factors A, B, and C, *i.e.*, reaction temperature, and  $K_3$  denotes the index examined in the experiment where the third level of factors A, B, and C, *i.e.*, reaction time. The  $k_1$ ,  $k_2$ , and  $k_3$  denote the mean values of  $K_1$ ,  $K_2$ , and  $K_3$ , respectively. The  $r$  is the extreme difference, which is calculated from the difference between the maximum and minimum values of  $k_1$ ,  $k_2$ , and  $k_3$  in each column. The best solution for this experiment is  $A_2B_1C_1$ , *i.e.*, the mass ratio of CA and PVA is 3:1, the reaction temperature is 130 °C, and the reaction time is 3 h. This result also agrees with the results of the single-factor experiment.

| Number | Factors  |                 |        |                                        |
|--------|----------|-----------------|--------|----------------------------------------|
|        | mCA:mPVA | Temperature /°C | Time/h | Adsorption capacity/mg g <sup>-1</sup> |
|        | A        | B               | C      |                                        |
| 1      | 2:1      | 130             | 3      | 179.6                                  |
| 2      | 2:1      | 140             | 4      | 162.8                                  |
| 3      | 2:1      | 150             | 5      | 146.2                                  |
| 4      | 3:1      | 130             | 5      | 183.2                                  |
| 5      | 3:1      | 140             | 4      | 181.6                                  |
| 6      | 3:1      | 150             | 3      | 177.0                                  |
| 7      | 4:1      | 130             | 4      | 173.6                                  |



|    |        |        |        |       |
|----|--------|--------|--------|-------|
| 8  | 4:1    | 140    | 5      | 184.2 |
| 9  | 4:1    | 150    | 3      | 176.0 |
| K1 | 488.6  | 536.4  | 532.62 |       |
| K2 | 541.8  | 528.6  | 517.6  |       |
| K3 | 533.82 | 499.22 | 513.6  |       |
| k1 | 162.87 | 178.8  | 177.54 |       |
| k2 | 180.6  | 176.2  | 172.53 |       |
| k3 | 177.94 | 166.41 | 171.2  |       |
| R  | 17.73  | 12.39  | 6.34   |       |

---
